# Supplementary material for: A Review of Transcriptomics and Metabolomics in Plant Quality and Environmental Response: From Bibliometric Analysis to Science Mapping and Future Trends
Source: MDPI journal article supplement (doi:10.3390/metabo14050272), 2024-05-08
Supplement: s1 [file s1]

## Supplementary Tables

**Table S1** Web of Science search equations and number of articles per search.

| No. | Search commands using the field topic                                                                                                                                                                                                                                                                                                                                                                           | No. ref. |
|-----|-----------------------------------------------------------------------------------------------------------------------------------------------------------------------------------------------------------------------------------------------------------------------------------------------------------------------------------------------------------------------------------------------------------------|----------|
| 1   | Plant* AND ((Transcriptomics* OR "RNA Seq") AND Metabolomics* )                                                                                                                                                                                                                                                                                                                                                 | 475      |
| 2   | Plant* AND ((Transcriptomics* OR "RNA Seq") AND Metabolomics* ) AND ((environment* OR ecotype*) AND (quality* OR character*))                                                                                                                                                                                                                                                                                   | 46       |
| 3   | Plant* AND ((Transcriptomics* OR "RNA Seq") AND Metabolomics* ) AND ((environment* OR ecotype*) OR (quality* OR character*))                                                                                                                                                                                                                                                                                    | 229      |
| 4   | Plant* AND ((Transcriptomics* OR "RNA Seq") OR Metabolomics* ) AND ((environment* OR ecotype*) AND (quality* OR character*))                                                                                                                                                                                                                                                                                    | 576      |
| 5   | Plant* AND ((Transcriptomics* OR "RNA Seq") AND Metabolomics* ) AND (environment* OR ecotype* OR stress OR "environmental response"OR habitat* OR ecology*)                                                                                                                                                                                                                                                     | 249      |
| 6   | Plant* AND ((Transcriptomics* OR "RNA Seq") AND Metabolomics* ) AND (quality* OR character* OR "active ingredient"OR "chemical marker"OR biosynthesis* OR "secondary metabolites"OR compound*)                                                                                                                                                                                                                  | 269      |
| 7   | Plant* AND ((Transcript* OR "RNA Seq") AND Metabolite*) AND ((environment* OR ecotype*) AND (quality* OR character*))                                                                                                                                                                                                                                                                                           | 234      |
| 8   | Plant* AND ((Transcriptomics* OR "RNA Seq"OR "gene expression"OR "transcription factors"OR "Differentially expressed genes") AND Metabolomics* ) AND ((environment* OR ecotype* OR stress) AND (quality* OR character*))                                                                                                                                                                                        | 133      |
| 9   | (Transcriptome* OR Transcriptomics* OR "RNA Seq"OR "gene expression"OR "transcription factors"OR "Differentially expressed genes") AND (Metabolomics* OR metabolome* OR Metabolite*) AND (environment* OR ecotype* OR stress OR "environmental response"OR habitat* OR ecology*) AND (quality* OR character* OR "active ingredient"OR "chemical marker"OR biosynthesis* OR "secondary metabolites"OR compound*) | 866      |
| 10  | Plant* AND ((Transcriptomics* OR "RNA Seq"OR scRNA OR smFISH OR SSR OR SNP OR EST-SSR OR microRNA OR lncRNA OR "RNA editing" OR "Alternative splicing") AND (Metabolomics* OR LC-MS OR NMR OR GC-MS OR CE-MS OR FT-IR ) )AND ( (environment* OR ecotype*) OR (quality* OR character*))                                                                                                                          | 288      |
| 11  | Plant* AND (Transcriptomics* OR "RNA Seq"OR scRNA OR smFISH OR SSR OR SNP OR EST-SSR OR microRNA OR lncRNA OR "RNA editing" OR "Alternative splicing")                                                                                                                                                                                                                                                          | 156      |
|     | In total                                                                                                                                                                                                                                                                                                                                                                                                        | 3521     |
|     | Total number of references without duplicates                                                                                                                                                                                                                                                                                                                                                                   | 1753     |

**Table S2** The top clusters of co-occurrence in research on transcriptomics and metabolomics in plant quality and environmental response (TMPQE) during 1994-2020.

| 1994-2020 |      |            |                  |                          |
|-----------|------|------------|------------------|--------------------------|
| ClusterID | Size | Silhouette | mean(Citee Year) | Label (LLR)              |
| 0         | 28   | 0.868      | 2008             | arabidopsis leave        |
| 1         | 27   | 0.859      | 2010             | maize pulvini            |
| 2         | 27   | 0.766      | 2009             | specific function        |
| 3         | 25   | 0.838      | 2010             | panicum virgatum         |
| 4         | 23   | 0.750      | 2009             | secondary metabolite     |
| 2004-2015 |      |            |                  |                          |
| ClusterID | Size | Silhouette | mean(Citee Year) | Label (LLR)              |
| 0         | 31   | 0.692      | 2008             | mitochondrial metabolism |
| 1         | 28   | 0.589      | 2008             | verticillium dahliae     |
| 5         | 22   | 0.685      | 2007             | high temperature         |
| 2016-2020 |      |            |                  |                          |
| ClusterID | Size | Silhouette | mean(Citee Year) | Label (LLR)              |
| 0         | 17   | 0.839      | 2017             | metabolome analyses      |
| 1         | 16   | 0.848      | 2017             | candidate gene           |
| 3         | 14   | 0.82       | 2017             | endogenous auxin level   |

**Table S3** Leading journals in TMPQE research.

| Ranked by TP |                                   |     |        | Ranked by TLC/t |                                                                                 |     |        |
|--------------|-----------------------------------|-----|--------|-----------------|---------------------------------------------------------------------------------|-----|--------|
| Rank         | Journal                           | TP  | TLCS/t | Rank            | Journal                                                                         | TP  | TLCS/t |
| 1            | FRONTIERS IN PLANT SCIENCE        | 156 | 0      | 1               | THE PLANT JOURNAL                                                               | 109 | 45.48  |
| 2            | PLANT PHYSIOLOGY                  | 122 | 44.31  | 2               | PLANT PHYSIOLOGY                                                                | 122 | 44.31  |
| 3            | BMC PLANT BIOLOGY                 | 120 | 0      | 3               | THE PLANT CELL                                                                  | 97  | 40.04  |
| 4            | THE PLANT JOURNAL                 | 110 | 45.48  | 4               | JOURNAL OF EXPERIMENTAL BOTANY                                                  | 77  | 18.25  |
| 5            | PLANT CELL                        | 97  | 40.04  | 5               | PLANT CELL AND ENVIRONMENT                                                      | 50  | 17.69  |
| 6            | JOURNAL OF EXPERIMENTAL BOTANY    | 78  | 18.25  | 6               | MOLECULAR PLANT                                                                 | 24  | 11.29  |
| 7            | NEW PHYTOLOGIST                   | 54  | 6.26   | 7               | PLANT BIOTECHNOLOGY JOURNAL                                                     | 35  | 8.3    |
| 8            | PLANT PHYSIOLOGY AND BIOCHEMISTRY | 52  | 5.43   | 8               | PROCEEDINGS OF THE NATIONAL ACADEMY OF SCIENCES OF THE UNITED STATES OF AMERICA | 8   | 7.22   |
| 9            | PLANT CELL AND ENVIRONMENT        | 50  | 17.69  | 9               | PLANT MOLECULAR BIOLOGY                                                         | 39  | 6.85   |
| 10           | BMC GENOMICS                      | 42  | 0      | 10              | NEW PHYTOLOGIST                                                                 | 53  | 6.26   |

Note: TP: total number of publication; TLCS/t: average local citations received per year.

**Table S4** Journal Related Abbreviations.

| Abbreviation | Explanation                           |
|--------------|---------------------------------------|
| PJ           | THE PLANT JOURNAL                     |
| PP           | PLANT PHYSIOLOGY                      |
| PC           | THE PLANT CELL                        |
| JEB          | JOURNAL OF EXPERIMENTAL BOTANY        |
| PCE          | PLANT CELL AND ENVIRONMENT            |
| MP           | MOLECULAR PLANT                       |
| PBJ          | PLANT BIOTECHNOLOGY JOURNAL           |
| PMB          | PLANT MOLECULAR BIOLOGY               |
| NP           | NEW PHYTOLOGIST                       |
| PPB          | PLANT PHYSIOLOGY AND BIOCHEMISTRY     |
| PCP          | PLANT AND CELL PHYSIOLOGY             |
| PL           | PLANTA                                |
| PH           | PHYTOCHEMISTRY                        |
| EEB          | ENVIRONMENTAL AND EXPERIMENTAL BOTANY |
| JPP          | JOURNAL OF PLANT PHYSIOLOGY           |
| PS           | PLANT SCIENCE                         |
| FIPS         | FRONTIERS IN PLANT SCIENCE            |
| BPB          | BMC PLANT BIOLOGY                     |
| BG           | BMC GENOMICS                          |
| SR           | SCIENTIFIC REPORTS                    |

**Table S5** Methodology related abbreviations.

| Abbreviation | Explanation                                                                                                     |
|--------------|-----------------------------------------------------------------------------------------------------------------|
| TP           | total number of publication                                                                                     |
| TLCS         | total local citations received                                                                                  |
| TLCS/t       | average local citations received per year                                                                       |
| TGCS         | total global citations received                                                                                 |
| TGCS/t       | average global citations received per year                                                                      |
| TLCR         | total local cited references                                                                                    |
| h-index      | an unbiased indicator to assess the performance of scientific outputs according to quantity and quality aspects |
| SCP          | single country publication                                                                                      |
| MCP          | multiple countries publication                                                                                  |
| MCP ratio    | measure the international collaboration intensity of a country                                                  |

1 **Table S6** Theoretical basis: top 10 cited articles in research on transcriptomics and metabolomics in plant quality and environmental response

2 (TMPQE).

| No. | Title                                                                                                                               | Author      | Year | Journal                                                                   | Country | Institution                                                   | Citations | Classification | Ref. |
|-----|-------------------------------------------------------------------------------------------------------------------------------------|-------------|------|---------------------------------------------------------------------------|---------|---------------------------------------------------------------|-----------|----------------|------|
| #1  | Analysis of relative gene expression data using real-time quantitative PCR and the 2(T)(-Delta Delta C) method                      | Livak KJ    | 2001 | METHODS                                                                   | USA     | Washington State Univ                                         | 228       | (a)            | [44] |
| #2  | Controlling the False Discovery Rate: A Practical and Powerful Approach to Multiple Testing                                         | BENJAMINI Y | 1995 | JOURNAL OF THE ROYAL STATISTICAL SOCIETY SERIES B-STATISTICAL METHODOLOGY | Israel  | Tei Aviv Univ                                                 | 136       | (a)            | [45] |
| #3  | MAPMAN: a user-driven tool to display genomics data sets onto diagrams of metabolic pathways and other biological processes         | Thimm O     | 2004 | PLANT JOURNAL                                                             | Germany | Max Planck Inst Mol Physiol                                   | 110       | (b)            | [46] |
| #4  | Full-length transcriptome assembly from RNA-Seq data without a reference genome                                                     | Grabherr MG | 2011 | NATURE BIOTECHNOLOGY                                                      | Israel  | Hebrew Univ Jerusalem                                         | 100       | (b)            | [47] |
| #5  | Floral dip: a simplified method for Agrobacterium-mediated transformation of Arabidopsis thaliana                                   | Clough SJ   | 1998 | PLANT JOURNAL                                                             | USA     | Department of Crop Sciences, University of Illinois at Urbana | 93        | (c)            | [50] |
| #6  | Blast2GO: a universal tool for annotation, visualization and analysis in functional genomics research                               | Conesa A    | 2005 | BIOINFORMATICS                                                            | Spain   | Inst Valenciano Invest Agr                                    | 81        | (b)            | [48] |
| #7  | Gas chromatography mass spectrometry-based metabolite profiling in plants                                                           | Lisec J     | 2006 | Nature Protocols                                                          | Germany | Max Planck Inst Mol Pflanzphysiol                             | 79        | (c)            | [51] |
| #8  | Mapping and quantifying mammalian transcriptomes by RNA-Seq                                                                         | Mortazavi A | 2008 | NATURE METHODS                                                            | USA     | Div Biol                                                      | 77        | (c)            | [52] |
| #9  | A Rapid and Sensitive Method for the Quantitation of Microgram Quantities of Protein Utilizing the Principle of Protein-Dye Binding | BRADFORD MM | 1976 | ANALYTICAL BIOCHEMISTRY                                                   | Georgia | Univ of Georgia                                               | 74        | (c)            | [53] |

|     |                                                                                                       |            |      |                  |     |                          |    |     |      |
|-----|-------------------------------------------------------------------------------------------------------|------------|------|------------------|-----|--------------------------|----|-----|------|
| #10 | Differential gene and transcript expression analysis of RNA-seq experiments with TopHat and Cufflinks | Trapnell C | 2012 | Nature Protocols | USA | Broad Inst MIT & Harvard | 69 | (b) | [49] |
|-----|-------------------------------------------------------------------------------------------------------|------------|------|------------------|-----|--------------------------|----|-----|------|

---

3

Note: Citations means the number of citations of the article in the TMPQE local dataset. (a) Theoretical algorithm; (b) Development of Bioinformatics

4

tools and software; (c) Establishing experimental methods and protocol

**Table S7** Detailed overview of the 29 most influential articles (with respect to TLC value > 14) from citation mapping

| Node Number | Title                                                                                                                                               | Year | Author         | Journal                                                                                | LCS | GCS | research streams group | Ref. |
|-------------|-----------------------------------------------------------------------------------------------------------------------------------------------------|------|----------------|----------------------------------------------------------------------------------------|-----|-----|------------------------|------|
| 18          | Integration of transcriptomics and metabolomics for understanding of global responses to nutritional stresses in <i>Arabidopsis thaliana</i>        | 2004 | Hirai MY       | PROCEEDINGS OF THE NATIONAL ACADEMY OF SCIENCES OF THE UNITED STATES OF AMERICA        | 43  | 469 | (1)                    | [14] |
| 19          | Exploring the temperature-stress metabolome of <i>Arabidopsis</i>                                                                                   | 2004 | Kaplan F       | PLANT PHYSIOLOGY                                                                       | 48  | 554 | (2)                    | [69] |
| 23          | Functional genomics by integrated analysis of metabolome and transcriptome of <i>Arabidopsis</i> plants over-expressing an MYB transcription factor | 2005 | Tohge T        | PLANT JOURNAL                                                                          | 33  | 569 | (1)                    | [63] |
| 24          | Systems rebalancing of metabolism in response to sulfur deprivation, as revealed by metabolome analysis of <i>Arabidopsis</i> plants                | 2005 | Nikiforova VJ  | PLANT PHYSIOLOGY                                                                       | 14  | 221 | (1)                    | [57] |
| 28          | Elucidation of gene-to-gene and metabolite-to-gene networks in <i>Arabidopsis</i> by integration of metabolomics and transcriptomics                | 2005 | Hirai MY       | JOURNAL OF BIOLOGICAL CHEMISTRY                                                        | 32  | 324 | (1)                    | [58] |
| 58          | Omics-based identification of <i>Arabidopsis</i> Myb transcription factors regulating aliphatic glucosinolate biosynthesis                          | 2007 | Hirai MY       | PROCEEDINGS OF THE NATIONAL ACADEMY OF SCIENCES OF THE UNITED STATES OF AMERICA (PNAS) | 40  | 447 | (1)                    | [66] |
| 61          | The R2R3-MYB transcription factor HAG1/MYB28 is a regulator of methionine-derived glucosinolate biosynthesis in <i>Arabidopsis thaliana</i>         | 2007 | Gigolashvili T | PLANT JOURNAL                                                                          | 21  | 259 | (1) & (3)              | [67] |
| 67          | Transcriptional regulation of anthocyanin biosynthesis in ripening fruits of grapevine under seasonal water deficit                                 | 2007 | Castellarin SD | PLANT CELL AND ENVIRONMENT                                                             | 14  | 295 | (1) & (4)              | [80] |
| 68          | Water deficits accelerate ripening and induce changes in gene expression regulating flavonoid                                                       | 2007 | Castellarin SD | PLANTA                                                                                 | 15  | 299 | (1) & (2) & (4)        | [68] |

biosynthesis in grape berries

|     |                                                                                                                                                        |      |           |                                |    |     |           |      |
|-----|--------------------------------------------------------------------------------------------------------------------------------------------------------|------|-----------|--------------------------------|----|-----|-----------|------|
| 70  | Quality control for plant metabolomics: reporting MSI-compliant studies                                                                                | 2008 | Fiehn O   | PLANT JOURNAL                  | 14 | 326 | (5)       | [83] |
| 92  | Metabolic responses to salt stress of barley ( <i>Hordeum vulgare</i> L.) cultivars, Sahara and Clipper, which differ in salinity tolerance            | 2009 | Widodo    | JOURNAL OF EXPERIMENTAL BOTANY | 17 | 204 | (2)       | [70] |
| 107 | Ectopic Expression of VvMybPA2 Promotes Proanthocyanidin Biosynthesis in Grapevine and Suggests Additional Targets in the Pathway                      | 2009 | Terrier N | PLANT PHYSIOLOGY               | 16 | 207 | (1)       | [64] |
| 113 | Characterization of the ABA-regulated global responses to dehydration in <i>Arabidopsis</i> by metabolomics                                            | 2009 | Urano K   | PLANT JOURNAL                  | 30 | 287 | (2)       | [75] |
| 137 | A guide to using MapMan to visualize and compare Omics data in plants: a case study in the crop species, Maize                                         | 2009 | Usadel B  | PLANT CELL AND ENVIRONMENT     | 21 | 300 | (5)       | [81] |
| 165 | The <i>Arabidopsis</i> bZIP transcription factor HY5 regulates expression of the PFG1/MYB12 gene in response to light and ultraviolet-B radiation      | 2010 | Stracke R | PLANT CELL AND ENVIRONMENT     | 15 | 182 | (2)       | [71] |
| 166 | Developmental Stage Specificity and the Role of Mitochondrial Metabolism in the Response of <i>Arabidopsis</i> Leaves to Prolonged Mild Osmotic Stress | 2010 | Skirycz A | PLANT PHYSIOLOGY               | 14 | 155 | (2)       | [76] |
| 183 | Characterization of Transcriptional Complexity during Berry Development in <i>Vitis vinifera</i> Using RNA-Seq                                         | 2010 | Zenoni S  | PLANT PHYSIOLOGY               | 14 | 248 | (1) & (4) | [61] |
| 228 | Molecular and Physiological Analysis of Drought Stress in <i>Arabidopsis</i> Reveals Early Responses Leading to Acclimation in Plant Growth            | 2010 | Harb A    | PLANT PHYSIOLOGY               | 14 | 329 | (2)       | [73] |
| 255 | Negative Regulation of Anthocyanin Biosynthesis in <i>Arabidopsis</i> by a miR156-Targeted SPL Transcription Factor                                    | 2011 | Gou JY    | PLANT CELL                     | 16 | 352 | (1)       | [65] |
| 260 | The Jasmonate-ZIM-Domain Proteins Interact with the WD-Repeat/bHLH/MYB Complexes to Regulate Jasmonate-Mediated Anthocyanin Accumulation               | 2011 | Qi TC     | PLANT CELL                     | 15 | 354 | (1)       | [88] |

and Trichome Initiation in *Arabidopsis thaliana*

|     |                                                                                                                                                                                                       |      |               |                            |    |     |           |      |
|-----|-------------------------------------------------------------------------------------------------------------------------------------------------------------------------------------------------------|------|---------------|----------------------------|----|-----|-----------|------|
| 330 | Drought Responses of Leaf Tissues from Wheat Cultivars of Differing Drought Tolerance at the Metabolite Level                                                                                         | 2012 | Bowne JB      | MOLECULAR PLANT            | 16 | 165 | (2)       | [74] |
| 383 | The Grapevine Expression Atlas Reveals a Deep Transcriptome Shift Driving the Entire Plant into a Maturation Program                                                                                  | 2012 | Fasoli M      | PLANT CELL                 | 17 | 178 | (1) & (4) | [59] |
| 401 | Genome-Wide Analysis Uncovers Regulation of Long Intergenic Noncoding RNAs in <i>Arabidopsis</i>                                                                                                      | 2012 | Liu J         | PLANT CELL                 | 14 | 305 | (5)       | [84] |
| 444 | Transcriptome Responses to Combinations of Stresses in <i>Arabidopsis</i>                                                                                                                             | 2013 | Rasmussen S   | PLANT PHYSIOLOGY           | 15 | 213 | (5)       | [85] |
| 459 | Comprehensive Dissection of Spatiotemporal Metabolic Shifts in Primary, Secondary, and Lipid Metabolism during Developmental Senescence in <i>Arabidopsis</i>                                         | 2013 | Watanabe M    | PLANT PHYSIOLOGY           | 14 | 136 | (1) & (4) | [60] |
| 467 | <i>Arabidopsis</i> Basic Helix-Loop-Helix Transcription Factors MYC2, MYC3, and MYC4 Regulate Glucosinolate Biosynthesis, Insect Performance, and Feeding Behavior                                    | 2013 | Schweizer F   | PLANT CELL                 | 15 | 189 | (1) & (3) | [77] |
| 522 | Enhancement of oxidative and drought tolerance in <i>Arabidopsis</i> by overaccumulation of antioxidant flavonoids                                                                                    | 2014 | Nakabayashi R | PLANT JOURNAL              | 28 | 273 | (1) & (2) | [72] |
| 552 | Mercator: a fast and simple web server for genome scale functional annotation of plant sequence data                                                                                                  | 2014 | Lohse M       | PLANT CELL AND ENVIRONMENT | 18 | 218 | (5)       | [82] |
| 713 | Full-length transcriptome sequences and splice variants obtained by a combination of sequencing platforms applied to different root tissues of <i>Salvia miltiorrhiza</i> and tanshinone biosynthesis | 2015 | Xu ZC         | PLANT JOURNAL              | 18 | 124 | (1)       | [62] |

Note: research streams group: (1) biosynthetic pathway; (2) abiotic stress; (3) biotic stress; (4) development and ripening; (5) methodology and tools.
